# Supplementary material for: KRAS Allelic Variants in Biliary Tract Cancers
Source: PubMed Central journal article supplement (PMC11074811; doi:10.1001/jamanetworkopen.2024.9840), 2024-05-06
Supplement: jamanetwopen-e249840-s001.pdf [file jamanetwopen-e249840-s001.pdf]

## Data Sharing Statement

### Data

**Data available:** Yes

**Data types:** Deidentified participant data, Data (not involving human participants), Data dictionary

**How to access data:** The majority of the data that support the findings of this study are openly available in the AACR Project Genie at [https://genie.cbioportal.org/study/summary?id=genie\\_public](https://genie.cbioportal.org/study/summary?id=genie_public) and the cBioPortal For Cancer Genomics at <https://www.cbioportal.org/>. Raw data were generated at PMCC, MDACC, and Foundation Medicine. Derived data supporting the findings of this study are available from the corresponding author on request.

**When available:** With publication

### Supporting Documents

**Document types:** Statistical/analytic code, Informed consent form

**How to access documents:** Requests can be sent to [jennifer.knox@uhn.ca](mailto:jennifer.knox@uhn.ca)

**When available:** With publication

### Additional Information

**Who can access the data:** Anyone requesting the data.

**Types of analyses:** For any purpose.

**Mechanisms of data availability:** After the approval of the request.

**Any additional restrictions:** None.
